# Supplementary material for: Chicken volatiles repel host-seeking malaria mosquitoes
Source: PubMed Central journal article supplement (PMC4955153; doi:10.1186/s12936-016-1386-3), 2016-07-21

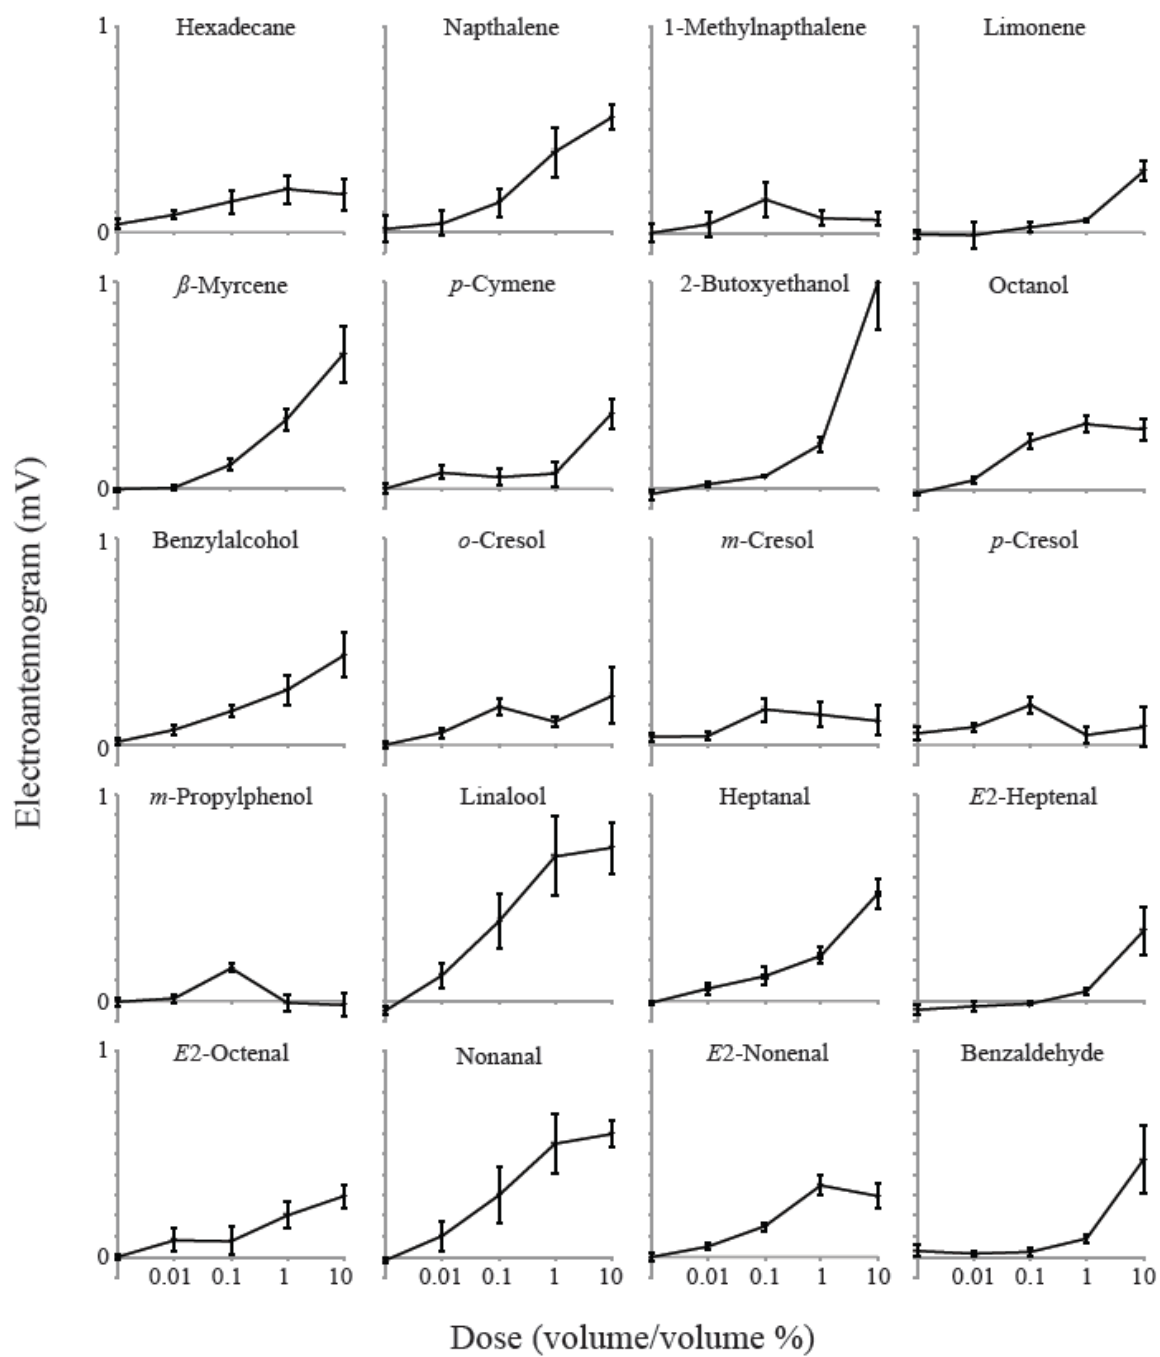

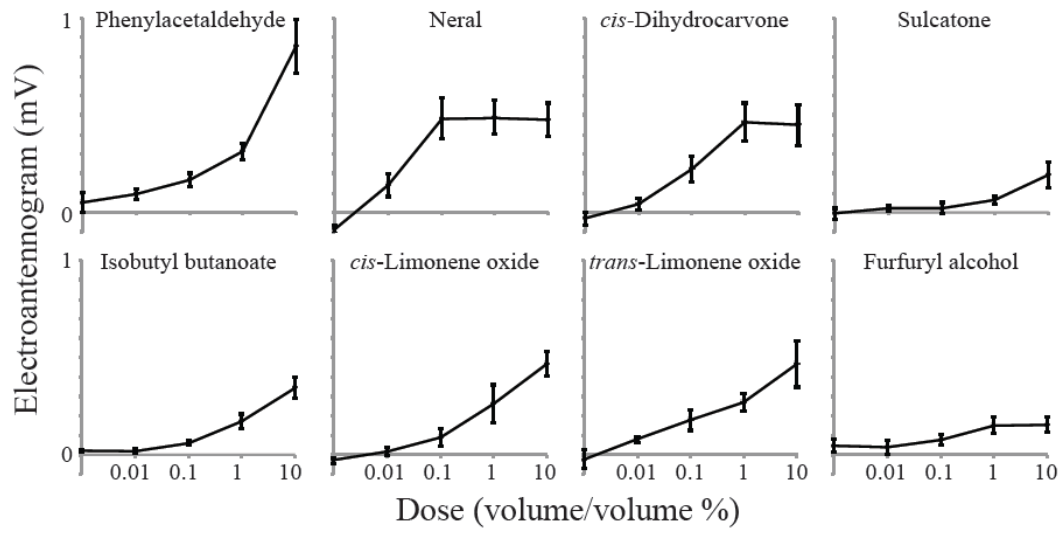

Supplement: 12936_2016_1386_MOESM2_ESM.pdf [file 12936_2016_1386_MOESM2_ESM.pdf]
