# Supplementary material for: Chicken volatiles repel host-seeking malaria mosquitoes
Source: Springer Nature journal article supplement (doi:10.1186/s12936-016-1386-3), 2016-07-11
Supplement: MOESM1 [file 10511500]

| Compounds                    | Systematic name                                  | Purity (%) | CAS number | Company              |
|------------------------------|--------------------------------------------------|------------|------------|----------------------|
| <b>Hydrocarbons</b>          |                                                  |            |            |                      |
| <b>Aliphatics</b>            |                                                  |            |            |                      |
| Hexadecane                   | Hexadecane                                       | 99         | 544-76-3   | Sigma-Aldrich        |
| <b>Aromatics</b>             |                                                  |            |            |                      |
| Naphthalene                  | Bicyclo[4.4.0]deca-1,3,5,7,9-pentene             | 99         | 91-20-3    | Sigma-Aldrich        |
| 1-Methylnaphthalene          | 1-Methyl-bicyclo[4.4.0]deca-1,3,5,7,9-pentene    | 97         | 90-12-0    | Sigma-Aldrich        |
| <b>Monoterpenes</b>          |                                                  |            |            |                      |
| Limonene                     | 1-Methyl-4-(1-methylethyl)-1-cyclohexene         | 92         | 5989-54-8  | Acros Organics       |
| $\beta$ -Myrcene             | 7-methyl-3-methylene-1,6-octadiene               | 90         | 123-35-3   | INC Biomedicals Inc. |
| <i>p</i> -Cymene             | 1-Methyl-4-(1-methylethyl)-benzene               | 99         | 99-87-6    | ACROS                |
| <b>Alcohols</b>              |                                                  |            |            |                      |
| <b>Aliphatics</b>            |                                                  |            |            |                      |
| 2-Butoxyethanol              | 2-Butoxy-ethanol                                 | 98         | 111-76-2   | Fluka                |
| Octanol                      | 1-Octanol                                        | 99         | 111-87-5   | Sigma-Aldrich        |
| <b>Aromatics</b>             |                                                  |            |            |                      |
| Benzyl alcohol               | Phenyl methanol                                  | 99         | 100-51-6   | Sigma-Aldrich        |
| <i>o</i> -Cresol             | 2-Methyl phenol                                  | 99         | 95-48-7    | Aldrich              |
| <i>m</i> -Cresol             | 3-Methyl phenol                                  | 97         | 108-39-4   | Aldrich              |
| <i>p</i> -Cresol             | 4-Methyl phenol                                  | 99         | 104-44-5   | Aldrich              |
| <i>m</i> -propylphenol       | 3-Propyl phenol                                  | 98         | 621-27-2   | Fluka                |
| <b>Monoterpenes</b>          |                                                  |            |            |                      |
| Linalool                     | 3,7-Dimethylocta-1,6-dien-3-ol                   | 97         | 78-70-6    | Aldrich              |
| <b>Aldehydes</b>             |                                                  |            |            |                      |
| <b>Aliphatics</b>            |                                                  |            |            |                      |
| Heptanal                     | Heptanal                                         | 95         | 111-71-7   | Aldrich              |
| <i>E</i> 2-Heptenal          | ( <i>2E</i> )-2-Heptenal                         | 95         | 18829-55-5 | SAFC                 |
| <i>E</i> 2-Octenal           | ( <i>2E</i> )-2-Octenal                          | 94         | 2548-87-0  | SAFC                 |
| Nonanal                      | Nonanal                                          | 95         | 124-19-6   | Acros Organics       |
| <i>E</i> 2-Nonenal           | ( <i>2E</i> )-2-Nonenal                          | 99         | 18829-56-6 | Sigma-Aldrich        |
| <b>Aromatics</b>             |                                                  |            |            |                      |
| Benzaldehyde                 | Phenyl methanal                                  | 99.5       | 100-52-7   | Fluka                |
| Phenyl acetaldehyde          | 2-Phenyl ethanal                                 | 95         | 122-78-1   | Sigma-Aldrich        |
| <b>Monoterpenes</b>          |                                                  |            |            |                      |
| Neral                        | ( <i>2E</i> )-3,7-Dimethyl-2,6-octadienal        | 95         | 106-26-3   | Sigma-Aldrich        |
| <b>Ketones</b>               |                                                  |            |            |                      |
| <b>Monoterpenes</b>          |                                                  |            |            |                      |
| <i>cis</i> -Dihydrocarvone   | <i>cis</i> -Menth-8(10)-en-2-one                 | 97         | 5524-05-0  | Aldrich              |
| <b>Irregular Terpenes</b>    |                                                  |            |            |                      |
| Sulcatone                    | 6-Methyl-5-hepten-2-one                          | 99         | 110-93-0   | Aldrich              |
| <b>Esters</b>                |                                                  |            |            |                      |
| <b>Aliphatics</b>            |                                                  |            |            |                      |
| Isobutyl butanoate           | 2-Methylpropyl butanoate                         | 98         | 539-90-2   | SAFC                 |
| <b>Others</b>                |                                                  |            |            |                      |
| <b>Monoterpenes</b>          |                                                  |            |            |                      |
| <i>cis</i> -Limonene oxide   | <i>cis</i> -Limonene 1,2-epoxide <sup>#)</sup>   | 97         | 1195-92-2  | Sigma-Aldrich        |
| <i>trans</i> -Limonene oxide | <i>trans</i> -Limonene 1,2-epoxide <sup>#)</sup> | 95         | 6909-30-4  | Sigma-Aldrich        |
| <b>Heterocyclics</b>         |                                                  |            |            |                      |
| Furfuryl alcohol             | 2-furan methanol                                 | 98         | 98-00-0    | Aldrich              |

<sup>#)</sup> Limonene = 1-Methyl-4-(1-methylethyl)-1-cyclohexene
